# Supplementary material
Source: PubMed Central journal article supplement (PMC2556240)
Supplement: JCI0835847sd.pdf [file JCI0835847sd.pdf]

## **SUPPLEMENTAL FIGURE LEGENDS**

**Supplemental Figure 1.** (A-D) HDAC3 expression was analyzed in wild-type and multiple settings of cardiac dysfunction. HDAC3 expression was not significantly changed following angiotensin infusion (A), thoracic aortic constriction (B), or myocardial infarction (C). HDAC3 expression was significantly decreased following 7 days of isoproterenol infusion (D). (E) No significant difference was seen in HDAC3 protein levels between wild-type and ZDF rat hearts. \* $P < 0.05$  versus wild-type littermates. ANG, angiotensin; TAC, thoracic aortic constriction; MI, myocardial infarction; BZ, border zone; REM, remote; ISO, isoproterenol.

**Supplemental Figure 2.** Electrocardiography (ECG) from lead II of wild-type and HDAC3cKO mice. HDAC3cKO mice show no overt abnormalities in sinus rhythm, although do show a larger QRS complex, indicative of a larger heart.

**Supplemental Figure 3.** Nuclear receptor expression in HDAC3cKO hearts. PPAR $\alpha$ , PPAR $\gamma$ , ERR $\alpha$ , and PGC-1 $\alpha$  were analyzed by real-time PCR. No significant changes were detected. All samples were normalized to 18S.

**Supplemental Figure 4.** MEF2 activity is moderately increased in HDAC3cKO hearts. HDAC3cKO mice were crossed to the desMEF reporter mice and stained for beta-galactosidase activity. Only moderate induction of MEF2 is seen at 6 weeks of age, however, this is a timepoint where these mice are undergoing their hypertrophic program.

**Supplemental Data.** Spreadsheets of all significantly up-regulated and down-regulated genes in HDAC3cKO hearts at 5-weeks-old compared to wild-type littermates.

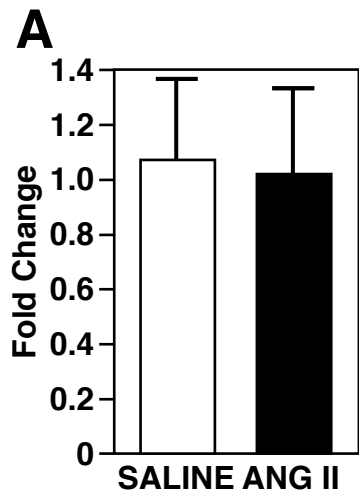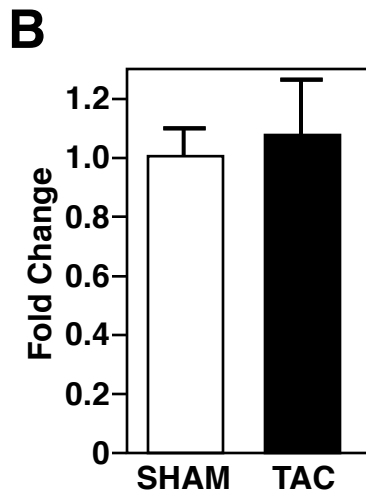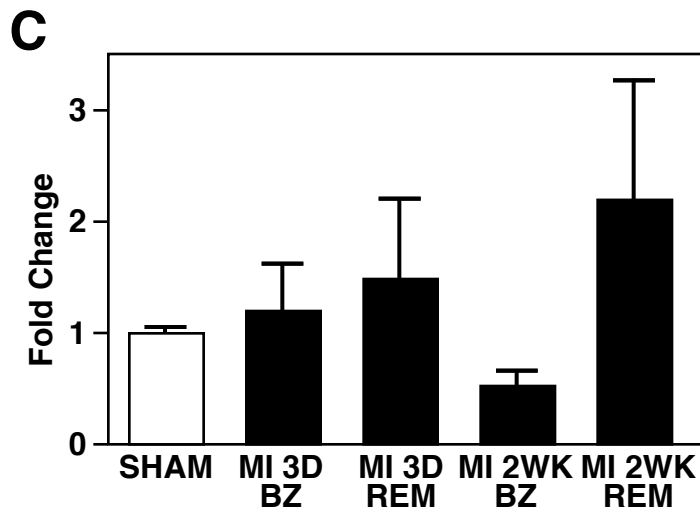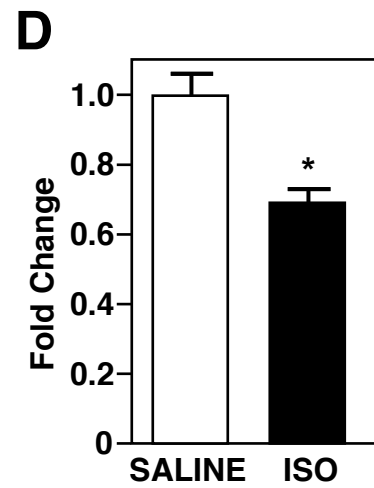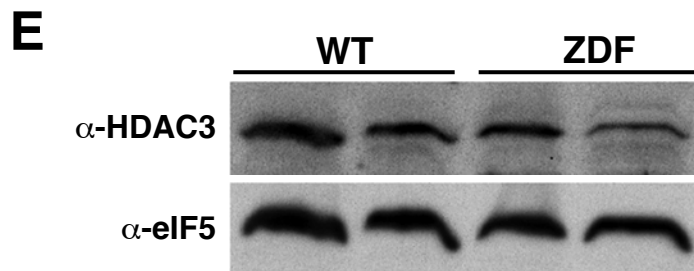

Supp Fig 1

**wild-type**

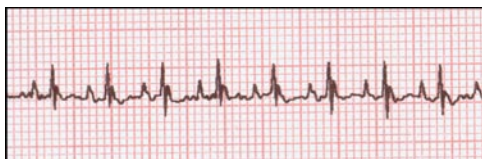

**HDAC3cKO**

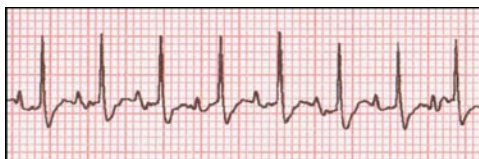

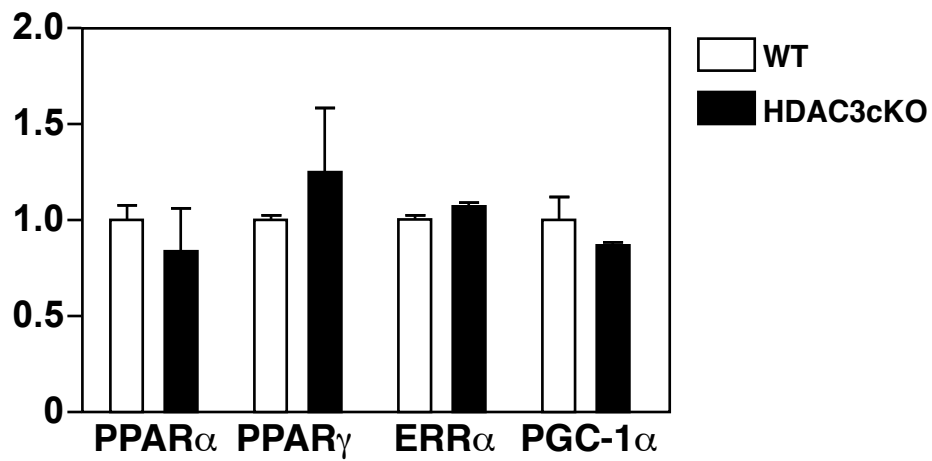

**HDAC3<sup>loxP/loxP</sup>;  
αMHC-Cre**

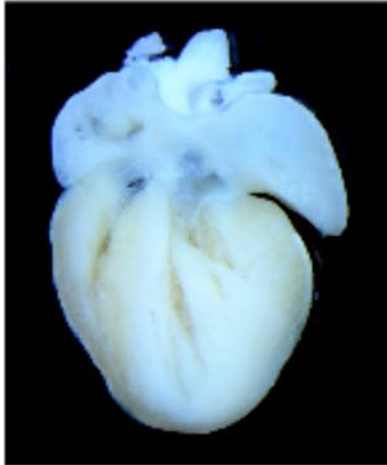

**HDAC3<sup>loxP/+</sup>;  
αMHC-Cre;  
desMEF**

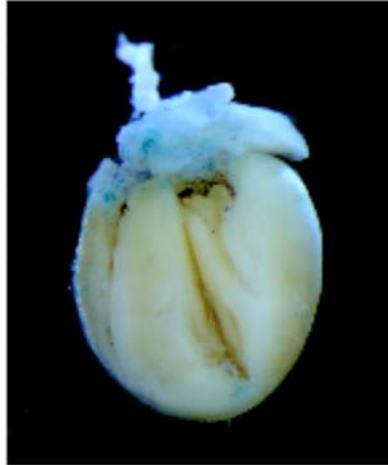

**HDAC3<sup>loxP/loxP</sup>;  
αMHC-Cre;  
desMEF**

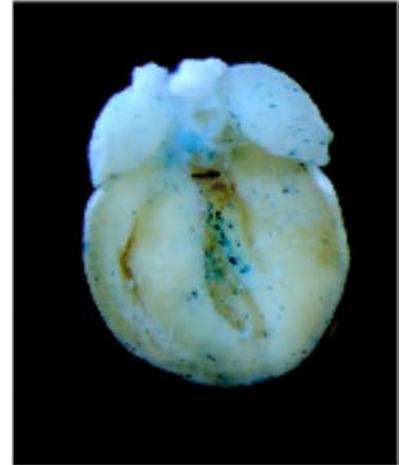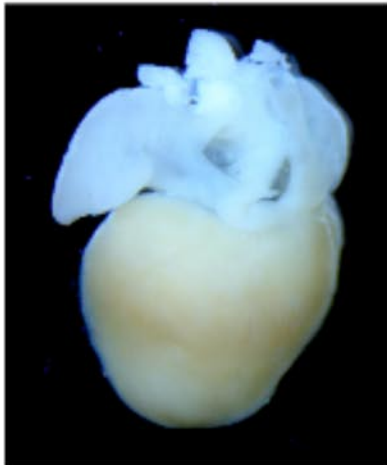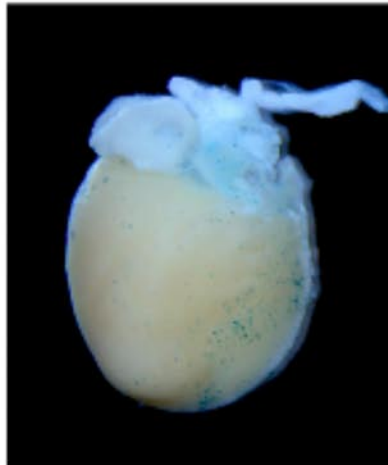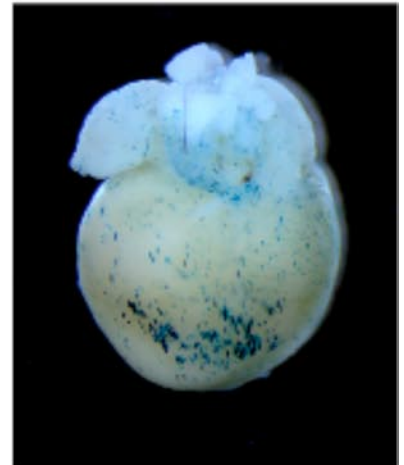

Primers for genotyping as seen in Figure 1C.

|                          |                         |
|--------------------------|-------------------------|
| HDAC3 5' loxP For Primer | GCTTGGTAGCCAGCCAGCTTAG  |
| HDAC3 5' loxP Rev Primer | CATGTGACCCCAGACATGACTGG |
| HDAC3 3' loxP Rev Primer | CAGTCCATGCCTATAATCCCAGC |

Primers for RT-PCR as seen in Figure 2A.

|                          |                        |
|--------------------------|------------------------|
| HDAC3 exon 10 For Primer | GGCTGTGATCGATTAGGCTGC  |
| HDAC3 exon 13 For Primer | CCGCATCGAGAATCAGAACTC  |
| HDAC3 exon 15 Rev Primer | CCTTGTCGTTGTCATGGTCGCC |

Primers for ChIP assays as seen in Figure 6A.

|                 |                        |
|-----------------|------------------------|
| UCP2 For Primer | CTTGGCTTAGCTTGGTGCAGAG |
| UCP2 Rev Primer | TCCAGGGACCGGAACCAACC   |
| UCP3 For Primer | GGAATCCAGTGCCTCCATGC   |
| UCP3 Rev Primer | GAAGCCTGAGCAGGGAACAG   |
| FACS For Primer | TCCCCACCGGGAACCTAGCA   |
| FACS Rev Primer | GAAGTTGCTGGTGGTGGGGTA  |
| FATP For Primer | GAATCTCGGTCCAGGGTGCC   |
| FATP Rev Primer | GCTCACACTTGATCACTCTTGC |
| PDK4 For Primer | CAGGTGCACAGCCCTTTGAG   |
| PDK Rev Primer  | CGAGCTGTTCTCCCGCTACAG  |
| UCP3 exon 5 For | GGGTGTGGTGTCTGTCTGTG   |
| UCP3 exon 5 Rev | TCCAGCAGCTTCTCCTTGAT   |

Primers for qChIP assays as seen in Figure 6C.

|           |                        |
|-----------|------------------------|
| mUCP2 For | GTGCAACAGGCGAGGCTCT    |
| mUCP2 Rev | ACCGGCACAAACCCGGGTG    |
| mUCP3 For | GGAGCCACATTAAAGAGCCC   |
| mUCP3 Rev | CACCATTCACTGTTGTCTCTGC |
| mFACS For | GAGGCTATGCCAAGGTGTC    |
| mFACS Rev | GAGCATGGCTGTCAGCAAGC   |
| mFATP For | GGGTCAAGAGCCCTAAACCTAA |
| mFATP Rev | TGCCTGCCCTCCTACTTGCTC  |
| mPDK For  | GAGAATCCCGAGTTCTTCGGT  |
| mPDK Rev  | CAGCTGCTGGACTTTGGTGAGA |
